# Supplementary material for: Enteropathogenic Escherichia coli (EPEC) Recruitment of PAR Polarity Protein Atypical PKCζ to Pedestals and Cell–Cell Contacts Precedes Disruption of Tight Junctions in Intestinal Epithelial Cells
Source: Int J Mol Sci. 2020 Jan 14;21(2):527. doi: 10.3390/ijms21020527 (PMC7014222; doi:10.3390/ijms21020527)
Supplement: Supplementary file 1 [file ijms-21-00527-s001.pdf]

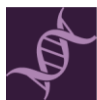

# Supplemental material

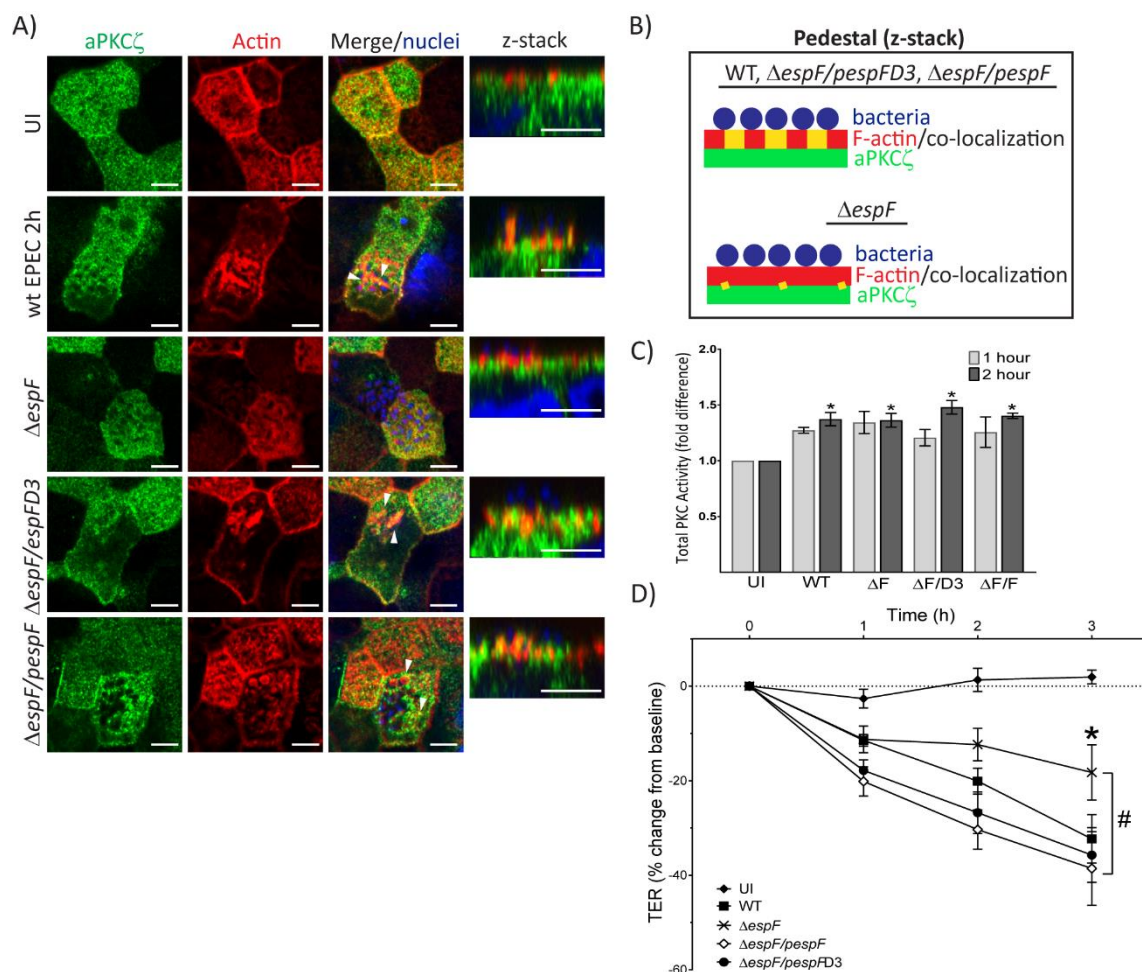

**Supplemental Figure 1.** EspF/SNX9 binding is dispensable in T84 cells for aPKC $\zeta$  and F-actin pedestal organization, PKC activity, and TJ disruption. T84 monolayers were infected, or not (UI), with wt EPEC,  $\Delta espF$ , or  $\Delta espF$  complemented with mutated *espF* ( $\Delta espF/espFD3$ ) or wt *espF* ( $\Delta espF/espF$ ) to assess the localization of aPKC $\zeta$  and F-actin, PKC kinase activity and TER. (A) aPKC $\zeta$  aggregates and co-localizes with F-actin under attached bacteria 2 hours post-infection with wt EPEC,  $\Delta espF/espFD3$  or  $\Delta espF/espF$ . In contrast, reduced co-localization is apparent after infection with  $\Delta espF$ . Arrowheads indicate regions of co-localization between aPKC $\zeta$  and F-actin. Scale bars: 10 $\mu$ m (en face); 5 $\mu$ m (z-stack). (B) Schematic representation of aPKC $\zeta$  (green), F-actin (red), and co-localization (yellow) within pedestals following infection with wt EPEC and EspF mutant strains. (C) Significant increase in PKC activity 2 hours post-infection with wt EPEC and EspF mutant strains compared to UI monolayers. \* $p < 0.05$ . (D) All EPEC strains significantly reduced TER 3 hours post-infection compared to UI # $p < 0.001$ . TER is significantly higher after infection with  $\Delta espF$ , but not  $\Delta espF/espFD3$ , compared to wt EPEC infection \* $p < 0.05$ . TER reported as percent change from baseline.
